# Supplementary material for: Ba6BO3Cl9and Pb6BO4Cl7: structural insights intoortho-borates with uncondensed BO4tetrahedra
Source: Royal Society of Chemistry journal article supplement (doi:10.1039/d0cc01927e), 2020-01-01
Supplement: d0cc01927e1.pdf [file d0cc01927e1.pdf]

## Supporting Information

### **Ba<sub>6</sub>BO<sub>3</sub>Cl<sub>9</sub> and Pb<sub>6</sub>BO<sub>4</sub>Cl<sub>7</sub>: Structural Insights into An *Ortho*-borate with Uncondensed BO<sub>4</sub> Tetrahedra**

Wei Li,<sup>a</sup> Hongping Wu,<sup>a,\*</sup> Hongwei Yu,<sup>a,\*</sup> Zhanggui Hu,<sup>a</sup> Jiyang Wang,<sup>a</sup> Yicheng Wu<sup>a</sup>

<sup>a</sup>Tianjin Key Laboratory of Functional Crystal Materials, Institute of Functional Crystals, Tianjin University of Technology, Tianjin 300384, China.

|                                                                                                                                                              |    |
|--------------------------------------------------------------------------------------------------------------------------------------------------------------|----|
| Experimental Procedures .....                                                                                                                                | 3  |
| Table S1 Crystal data and structure refinement for Ba <sub>6</sub> BO <sub>3</sub> Cl <sub>9</sub> and Pb <sub>6</sub> BO <sub>4</sub> Cl <sub>7</sub> ..... | 5  |
| Table S2 Atomic coordinates and equivalent isotropic displacement parameters for Ba <sub>6</sub> BO <sub>3</sub> Cl <sub>9</sub> ....                        | 6  |
| Table S3 Atomic coordinates and equivalent isotropic displacement parameters for Pb <sub>6</sub> BO <sub>4</sub> Cl <sub>7</sub> ....                        | 7  |
| Table S4 Selected bond distances and angles for Ba <sub>6</sub> BO <sub>3</sub> Cl <sub>9</sub> .....                                                        | 8  |
| Table S5 Selected bond distances and angles for Pb <sub>6</sub> BO <sub>4</sub> Cl <sub>7</sub> .....                                                        | 12 |
| Fig. S1 X-ray powder diffraction patterns of Ba <sub>6</sub> BO <sub>3</sub> Cl <sub>9</sub> and Pb <sub>6</sub> BO <sub>4</sub> Cl <sub>7</sub> .....       | 14 |
| Fig. S2 DSC-TG curves of Ba <sub>6</sub> BO <sub>3</sub> Cl <sub>9</sub> and Pb <sub>6</sub> BO <sub>4</sub> Cl <sub>7</sub> .....                           | 15 |
| Fig. S3 IR spectra of Ba <sub>6</sub> BO <sub>3</sub> Cl <sub>9</sub> and Pb <sub>6</sub> BO <sub>4</sub> Cl <sub>7</sub> .....                              | 16 |
| Fig. S4 UV–vis–NIR spectra of Ba <sub>6</sub> BO <sub>3</sub> Cl <sub>9</sub> and Pb <sub>6</sub> BO <sub>4</sub> Cl <sub>7</sub> .....                      | 17 |
| Fig. S5 The calculated band gaps of Ba <sub>6</sub> BO <sub>3</sub> Cl <sub>9</sub> and Pb <sub>6</sub> BO <sub>4</sub> Cl <sub>7</sub> .....                | 18 |
| References.....                                                                                                                                              | 19 |

## Experimental Procedures

### Reagents

Both  $\text{H}_3\text{BO}_3$  (AR, 99.5%) and  $\text{BaCO}_3$  (AR, 99.0%) were purchased from Shanghai Aladdin Chemistry Co., Ltd.,  $\text{PbCl}_2$  (AR, 99.5%),  $\text{BaCl}_2 \cdot 2\text{H}_2\text{O}$  (99.5%) and  $\text{PbO}$  (99.0%) were purchased from Tianjin Fu Chen Chemical Co., Ltd., all of the reagents were used as received without further treatment.

### Synthesis

Polycrystalline samples of  $\text{Ba}_6\text{BO}_3\text{Cl}_9$  and  $\text{Pb}_6\text{BO}_4\text{Cl}_7$  were prepared by the standard high-temperature solid-state reaction. The loaded compositions are  $\text{BaCO}_3$  (0.295 g, 1.5 mmol),  $\text{H}_3\text{BO}_3$  (0.062 g, 1 mmol),  $\text{BaCl}_2 \cdot 2\text{H}_2\text{O}$  (1.098 g, 4.5 mmol) for  $\text{Ba}_6\text{BO}_3\text{Cl}_9$  and  $\text{PbO}$  (0.558 g, 2.5 mmol),  $\text{H}_3\text{BO}_3$  (0.062 g, 1 mmol),  $\text{PbCl}_2$  (0.973 g, 3.5 mmol) for  $\text{Pb}_6\text{BO}_4\text{Cl}_7$ . All the reagents were mixed thoroughly ground in an agate mortar, heated to 300 °C for 10 h to decompose  $\text{CO}_2$  and  $\text{H}_2\text{O}$ . Then the mixtures were heated to 750 °C for  $\text{Ba}_6\text{BO}_3\text{Cl}_9$  and 345 °C for  $\text{Pb}_6\text{BO}_4\text{Cl}_7$ , and held at these temperatures for 3 days with three intermittent grindings every day. The phase purity of  $\text{Ba}_6\text{BO}_3\text{Cl}_9$  and  $\text{Pb}_6\text{BO}_4\text{Cl}_7$  were confirmed by powder X-ray diffraction (XRD) analysis.

### Crystal Growth

The single crystals of  $\text{Ba}_6\text{BO}_3\text{Cl}_9$  and  $\text{Pb}_6\text{BO}_4\text{Cl}_7$  were synthesized by high-temperature solution method. The crystals of  $\text{Ba}_6\text{BO}_3\text{Cl}_9$  were obtained with a mixture of  $\text{BaCO}_3$  (0.295g),  $\text{H}_3\text{BO}_3$  (0.062 g), and  $\text{BaCl}_2 \cdot 2\text{H}_2\text{O}$  (1.098 g) in the stoichiometric ratio of 1.5:1:4.5, while crystals of  $\text{Pb}_6\text{BO}_4\text{Cl}_7$  were grown in a chlorine-rich solution of  $\text{PbO}$  (0.335 g),  $\text{H}_3\text{BO}_3$  (0.062 g),  $\text{PbCl}_2$  (1.251 g) with a molar ratio of 1.5:1:4.5. The mixtures were put into a platinum crucible, which was put in a vertical programmable temperature furnace. The samples were heated at 850 °C for  $\text{Ba}_6\text{BO}_3\text{Cl}_9$  (450 °C for  $\text{Pb}_6\text{BO}_4\text{Cl}_7$ ) and kept for 1 h at this temperature to ensure complete melting and homogeneity of the raw materials. Then, the melts were cooled at a rate of 2 °C/h until the colorless and transparent crystals were observed, followed by cooling to room temperature at a rate of 20 °C/h.

### Single crystal X-ray diffraction

The crystal data of  $\text{Ba}_6\text{BO}_3\text{Cl}_9$  and  $\text{Pb}_6\text{BO}_4\text{Cl}_7$  were collected with the monochromatic  $\text{Mo K}\alpha$  radiation at 293(2) K on a Bruker SMART APEX II CCD diffractometer and integrated with the SAINT program.<sup>1</sup> All calculations were performed with programs from the SHELXTL

crystallographic software package. The structures were solved by direct methods using SHELXS system.<sup>2</sup> The atomic positions of the structure are refined with anisotropic displacement parameters and secondary extinction correction. PLATON<sup>3</sup> was used to check the structure for missing symmetry elements, and no higher symmetry was found.

#### **Powder X-ray Diffraction**

Powder XRD data for the polycrystalline powder of the title compounds were obtained on a SmartLab9KW X-ray diffractometer with Cu K $\alpha$  radiation ( $\lambda = 1.5418 \text{ \AA}$ ) at room temperature. The  $2\theta$  range was  $10^\circ$ - $70^\circ$  with a step size of  $0.02^\circ$  and a fixed counting time of 2 s/step.

#### **Infrared Spectroscopy**

A Nicolet iS50 FT-IR spectrometer was used to record the IR spectra of Ba<sub>6</sub>BO<sub>3</sub>Cl<sub>9</sub> and Pb<sub>6</sub>BO<sub>4</sub>Cl<sub>7</sub> in the range of 400-4000 cm<sup>-1</sup>. The sample was placed on the test platform for testing.

#### **UV-vis-NIR diffuse reflectance spectroscopy**

The optical diffuse reflectance spectra of title compounds were performed on a Hitachi UV-VIS-NIR spectrophotometer in the range of 190-2500 nm at 25 °C. The absorption (K/S) data are calculated from Kubelka-Munk function  $F(R) = (1-R)^2/2R = K/S$ , where R represents the reflectance, K the absorption, and S the scattering.<sup>4,5</sup>

#### **Thermal Stability**

A NETZSCH STA 4495 thermal analysis instrument was used to the thermal gravity-differential scanning calorimetric (TG-DSC) analysis for Ba<sub>6</sub>BO<sub>3</sub>Cl<sub>9</sub> and Pb<sub>6</sub>BO<sub>4</sub>Cl<sub>7</sub>. The powder samples were placed in a platinum crucible and heated from 25 °C to 950 °C for Ba<sub>6</sub>BO<sub>3</sub>Cl<sub>9</sub> and from 25 °C to 500 °C for Pb<sub>6</sub>BO<sub>4</sub>Cl<sub>7</sub>, and then cooled to room temperature at a rate of 10 °C /min with the help of flowing nitrogen atmosphere.

**Table S1.** Crystal data and structure refinement for Ba<sub>6</sub>BO<sub>3</sub>Cl<sub>9</sub> and Pb<sub>6</sub>BO<sub>4</sub>Cl<sub>7</sub>.

| Empirical formula                                                                                                                                                                                                                                                                                                                                                                                                 | Ba <sub>6</sub> BO <sub>3</sub> Cl <sub>9</sub>                                                       | Pb <sub>6</sub> BO <sub>4</sub> Cl <sub>7</sub>                                                                                                          |
|-------------------------------------------------------------------------------------------------------------------------------------------------------------------------------------------------------------------------------------------------------------------------------------------------------------------------------------------------------------------------------------------------------------------|-------------------------------------------------------------------------------------------------------|----------------------------------------------------------------------------------------------------------------------------------------------------------|
| Formula weight                                                                                                                                                                                                                                                                                                                                                                                                    | 1201.90                                                                                               | 1566.00                                                                                                                                                  |
| Temperature                                                                                                                                                                                                                                                                                                                                                                                                       | 300(2) K                                                                                              | 300(2) K                                                                                                                                                 |
| Wavelength                                                                                                                                                                                                                                                                                                                                                                                                        | 0.71073 Å                                                                                             | 0.71073 Å                                                                                                                                                |
| Crystal system                                                                                                                                                                                                                                                                                                                                                                                                    | Monoclinic                                                                                            | Triclinic                                                                                                                                                |
| Space group                                                                                                                                                                                                                                                                                                                                                                                                       | <i>P2<sub>1</sub>/c</i>                                                                               | <i>P</i> $\bar{1}$                                                                                                                                       |
| Unit cell dimensions                                                                                                                                                                                                                                                                                                                                                                                              | <i>a</i> = 8.229(2) Å<br><i>b</i> = 12.2589(17) Å<br><i>c</i> = 19.080(4) Å<br>$\beta$ = 90.203(12) ° | <i>a</i> = 8.001(3) Å<br><i>b</i> = 8.054(3) Å<br><i>c</i> = 13.116(5) Å<br>$\alpha$ = 89.522(13) °<br>$\beta$ = 89.663(14) °<br>$\gamma$ = 69.943(12) ° |
| Volume                                                                                                                                                                                                                                                                                                                                                                                                            | 1924.7(7) Å <sup>3</sup>                                                                              | 793.9(5) Å <sup>3</sup>                                                                                                                                  |
| <i>Z</i>                                                                                                                                                                                                                                                                                                                                                                                                          | 4                                                                                                     | 2                                                                                                                                                        |
| Density (g/cm <sup>3</sup> )                                                                                                                                                                                                                                                                                                                                                                                      | 4.148                                                                                                 | 6.687                                                                                                                                                    |
| Absorption coefficient (mm <sup>-1</sup> )                                                                                                                                                                                                                                                                                                                                                                        | 13.322                                                                                                | 64.567                                                                                                                                                   |
| F(000)                                                                                                                                                                                                                                                                                                                                                                                                            | 2072                                                                                                  | 1326                                                                                                                                                     |
| Theta range for data collection                                                                                                                                                                                                                                                                                                                                                                                   | 2.692 to 27.519°                                                                                      | 2.692 to 28.282°                                                                                                                                         |
| Limiting indices                                                                                                                                                                                                                                                                                                                                                                                                  | -10 ≤ <i>h</i> ≤ 10, -13 ≤ <i>k</i> ≤ 15, -24 ≤ <i>l</i> ≤ 22                                         | -10 ≤ <i>h</i> ≤ 10, -10 ≤ <i>k</i> ≤ 10, -17 ≤ <i>l</i> ≤ 17                                                                                            |
| Reflections collected / unique                                                                                                                                                                                                                                                                                                                                                                                    | 24716 / 4422 [R(int) = 0.0736]                                                                        | 10851 / 3944 [R(int) = 0.0734]                                                                                                                           |
| Completeness to theta                                                                                                                                                                                                                                                                                                                                                                                             | 99.9 %                                                                                                | 99.8 %                                                                                                                                                   |
| Refinement method                                                                                                                                                                                                                                                                                                                                                                                                 | Full-matrix least-squares on <i>F</i> <sup>2</sup>                                                    | Full-matrix least-squares on <i>F</i> <sup>2</sup>                                                                                                       |
| Data / restraints / parameters                                                                                                                                                                                                                                                                                                                                                                                    | 4422 / 0 / 173                                                                                        | 3944 / 0 / 163                                                                                                                                           |
| Goodness-of-fit on <i>F</i> <sup>2</sup>                                                                                                                                                                                                                                                                                                                                                                          | 1.273                                                                                                 | 1.005                                                                                                                                                    |
| Final <i>R</i> indices<br>[ <i>F</i> <sub>o</sub> <sup>2</sup> > 2σ( <i>F</i> <sub>o</sub> <sup>2</sup> )] <sup>[a]</sup>                                                                                                                                                                                                                                                                                         | <i>R</i> <sub>1</sub> = 0.0339<br><i>wR</i> <sub>2</sub> = 0.0683                                     | <i>R</i> <sub>1</sub> = 0.0481<br><i>wR</i> <sub>2</sub> = 0.0931                                                                                        |
| <i>R</i> indices (all data) <sup>[a]</sup>                                                                                                                                                                                                                                                                                                                                                                        | <i>R</i> <sub>1</sub> = 0.0521<br><i>wR</i> <sub>2</sub> = 0.1555                                     | <i>R</i> <sub>1</sub> = 0.0832<br><i>wR</i> <sub>2</sub> = 0.1090                                                                                        |
| Largest diff. peak and hole                                                                                                                                                                                                                                                                                                                                                                                       | 1.358 and -1.236 e·Å <sup>-3</sup>                                                                    | 2.143 and -2.991 e·Å <sup>-3</sup>                                                                                                                       |
| <sup>[a]</sup> <i>R</i> <sub>1</sub> = Σ   <i>F</i> <sub>o</sub>    -   <i>F</i> <sub>c</sub>   /Σ  <i>F</i> <sub>o</sub>    and <i>wR</i> <sup>2</sup> = [Σ <i>w</i> ( <i>F</i> <sub>o</sub> <sup>2</sup> - <i>F</i> <sub>c</sub> <sup>2</sup> ) <sup>2</sup> / Σ <i>w</i> <i>F</i> <sub>o</sub> <sup>4</sup> ] <sup>1/2</sup> for <i>F</i> <sub>o</sub> <sup>2</sup> > 2σ( <i>F</i> <sub>o</sub> <sup>2</sup> ) |                                                                                                       |                                                                                                                                                          |

**Table S2.** Atomic coordinates ( $\times 10^4$ ) and equivalent isotropic displacement parameters ( $\text{\AA}^2 \times 10^3$ ) for  $\text{Ba}_6\text{BO}_3\text{Cl}_9$ .  $U(\text{eq})$  is defined as one third of the trace of the orthogonalized  $U_{ij}$  tensor.

| <b>Atoms</b> | <b>x</b> | <b>y</b> | <b>z</b> | <b>U(eq)</b> | <b>BVS</b> |
|--------------|----------|----------|----------|--------------|------------|
| Ba(1)        | -531(1)  | 1730(1)  | 5081(1)  | 16(1)        | 2.13       |
| Ba(2)        | -517(1)  | 1748(1)  | 2422(1)  | 16(1)        | 2.17       |
| Ba(3)        | 4198(1)  | 3293(1)  | 4981(1)  | 18(1)        | 1.91       |
| Ba(4)        | 4214(1)  | 3302(1)  | 2531(1)  | 18(1)        | 1.95       |
| Ba(5)        | 4562(1)  | 384(1)   | 3729(1)  | 14(1)        | 2.24       |
| Ba(6)        | -486(1)  | 4569(1)  | 3767(1)  | 14(1)        | 2.46       |
| Cl(1)        | -600(2)  | -136(1)  | 6286(1)  | 21(1)        | 0.98       |
| Cl(2)        | -2055(2) | 4251(2)  | 5210(1)  | 23(1)        | 1.07       |
| Cl(3)        | -1502(2) | 7089(1)  | 3689(1)  | 22(1)        | 1.01       |
| Cl(4)        | -2127(2) | 4392(2)  | 2309(1)  | 24(1)        | 1.03       |
| Cl(5)        | -440(2)  | -57(1)   | 1228(1)  | 20(1)        | 1.09       |
| Cl(6)        | 3074(2)  | 754(2)   | 2267(1)  | 22(1)        | 1.19       |
| Cl(7)        | 7311(2)  | 2235(2)  | 3737(1)  | 23(1)        | 1.04       |
| Cl(8)        | 7048(2)  | -566(2)  | 4798(1)  | 25(1)        | 1.10       |
| Cl(9)        | 3570(2)  | -2046(1) | 3820(1)  | 22(1)        | 1.08       |
| B(1)         | 2039(10) | 2759(6)  | 3754(5)  | 15(2)        | 2.97       |
| O(1)         | 1276(6)  | 2987(4)  | 4383(3)  | 15(1)        | 2.16       |
| O(2)         | 1282(6)  | 3022(4)  | 3131(3)  | 15(1)        | 2.15       |
| O(3)         | 3593(6)  | 2371(4)  | 3756(3)  | 14(1)        | 2.24       |

**Table S3.** Atomic coordinates ( $\times 10^4$ ) and equivalent isotropic displacement parameters ( $\text{\AA}^2 \times 10^3$ ) for  $\text{Pb}_6\text{BO}_4\text{Cl}_7$ .  $U(\text{eq})$  is defined as one third of the trace of the orthogonalized  $U_{ij}$  tensor.

| <b>Atoms</b> | <b>x</b> | <b>y</b> | <b>z</b> | <b>U(eq)</b> | <b>BVS</b> |
|--------------|----------|----------|----------|--------------|------------|
| Pb(1)        | 1080(1)  | 109(1)   | 8679(1)  | 31(1)        | 1.91       |
| Pb(2)        | 5458(1)  | -178(1)  | 6766(1)  | 30(1)        | 2.02       |
| Pb(3)        | 4385(1)  | 2893(1)  | 9254(1)  | 33(1)        | 1.96       |
| Pb(4)        | 3584(1)  | 5138(1)  | 6489(1)  | 32(1)        | 1.90       |
| Pb(5)        | 379(1)   | 2005(1)  | 5729(1)  | 32(1)        | 1.95       |
| Pb(6)        | -945(1)  | 5475(1)  | 8075(1)  | 34(1)        | 1.79       |
| Cl(1)        | 166(6)   | -1504(6) | 6843(3)  | 34(1)        | 0.79       |
| Cl(2)        | 7203(5)  | -665(6)  | 9354(3)  | 31(1)        | 0.76       |
| Cl(3)        | 4488(6)  | 7011(6)  | 8165(4)  | 35(1)        | 0.76       |
| Cl(4)        | 6510(6)  | 1317(6)  | 4905(3)  | 32(1)        | 0.80       |
| Cl(5)        | 6572(6)  | 2670(6)  | 7466(3)  | 32(1)        | 1.20       |
| Cl(6)        | -1955(7) | 5665(6)  | 5804(4)  | 38(1)        | 0.73       |
| Cl(7)        | -1367(7) | 3583(6)  | 9848(4)  | 43(1)        | 0.72       |
| B(1)         | 2220(20) | 2610(30) | 7492(14) | 27(4)        | 2.99       |
| O(1)         | 404(14)  | 2549(14) | 7494(9)  | 27(3)        | 2.23       |
| O(2)         | 2930(14) | 2272(13) | 6444(8)  | 18(2)        | 1.87       |
| O(3)         | 2185(15) | 4358(14) | 7854(8)  | 24(3)        | 2.20       |
| O(4)         | 3354(14) | 1217(14) | 8192(8)  | 22(2)        | 2.22       |

**Table S4.** Selected bond distances (Å) and angles (deg) for Ba<sub>6</sub>BO<sub>3</sub>Cl<sub>9</sub>.

|                     |            |                       |            |
|---------------------|------------|-----------------------|------------|
| Ba(1)-O(1)          | 2.525(4)   | Ba(4)-O(2)            | 2.696(5)   |
| Ba(1)-Cl(7)#1       | 3.175(2)   | Ba(4)-Cl(5)#5         | 3.263(2)   |
| Ba(1)-Cl(8)#2       | 3.208(2)   | Ba(4)-Cl(1)#10        | 3.275(2)   |
| Ba(1)-Cl(3)#3       | 3.220(2)   | Ba(4)-Cl(6)           | 3.299(2)   |
| Ba(1)-Cl(1)         | 3.2425(19) | Ba(4)-Cl(4)#9         | 3.323(2)   |
| Ba(1)-Cl(9)#4       | 3.2922(19) | Ba(4)-Cl(3)#7         | 3.3477(19) |
| Ba(1)-Cl(2)         | 3.344(2)   | Ba(4)-Cl(9)#5         | 3.469(2)   |
| Ba(1)-Cl(1)#4       | 3.3916(19) | Ba(4)-Cl(6)#5         | 3.569(2)   |
| Ba(1)-Cl(8)#1       | 3.490(2)   | Ba(5)-O(3)            | 2.564(5)   |
| Ba(2)-O(2)          | 2.539(5)   | Ba(5)-Cl(6)           | 3.076(2)   |
| Ba(2)-Cl(7)#1       | 3.143(2)   | Ba(5)-Cl(9)           | 3.0926(18) |
| Ba(2)-Cl(5)         | 3.1772(19) | Ba(5)-Cl(8)           | 3.111(2)   |
| Ba(2)-Cl(6)         | 3.211(2)   | Ba(5)-Cl(8)#2         | 3.1186(19) |
| Ba(2)-Cl(9)#5       | 3.2246(18) | Ba(5)-Cl(4)#7         | 3.1442(19) |
| Ba(2)-Cl(3)#6       | 3.264(2)   | Ba(5)-Cl(7)           | 3.2046(19) |
| Ba(2)-Cl(1)#4       | 3.288(2)   | Ba(5)-Cl(1)#4         | 3.275(2)   |
| Ba(2)-Cl(4)         | 3.508(2)   | Ba(6)-O(2)            | 2.683(5)   |
| Ba(2)-Cl(4)#6       | 3.517(2)   | Ba(6)-O(1)            | 2.689(5)   |
| Ba(3)-O(3)          | 2.643(5)   | Ba(6)-Cl(2)           | 3.0707(19) |
| Ba(3)-O(1)          | 2.684(5)   | Ba(6)-Cl(4)           | 3.094(2)   |
| Ba(3)-Cl(5)#8       | 3.2286(19) | Ba(6)-Cl(6)#5         | 3.1570(18) |
| Ba(3)-Cl(5)#5       | 3.2373(18) | Ba(6)-Cl(2)#3         | 3.201(2)   |
| Ba(3)-Cl(9)#2       | 3.303(2)   | Ba(6)-Cl(3)           | 3.2028(18) |
| Ba(3)-Cl(2)#9       | 3.327(2)   | Ba(6)-Cl(5)#11        | 3.384(2)   |
| Ba(3)-Cl(3)#3       | 3.408(2)   | Ba(6)-Cl(7)#1         | 3.3878(19) |
| Ba(3)-Cl(2)#3       | 3.509(2)   | B(1)-O(3)             | 1.365(9)   |
| Ba(3)-Cl(8)#2       | 3.521(2)   | B(1)-O(2)             | 1.379(11)  |
| Ba(4)-O(3)          | 2.652(5)   | B(1)-O(1)             | 1.384(9)   |
| O(3)-Ba(1)-Cl(6)    | 75.91(15)  | O(3)-B(1)-O(2)        | 120.8(9)   |
| O(3)-Ba(1)-Cl(8)    | 146.30(13) | O(1)-B(1)-O(2)        | 118.7(8)   |
| Cl(6)-Ba(1)-Cl(8)   | 95.26(7)   | O(3)-Ba(2)-O(1)       | 52.95(18)  |
| O(3)-Ba(1)-Cl(9)    | 122.91(15) | O(3)-Ba(2)-Cl(5)#5    | 162.77(13) |
| Cl(6)-Ba(1)-Cl(9)   | 155.37(6)  | O(1)-Ba(2)-Cl(5)#5    | 119.21(13) |
| Cl(8)-Ba(1)-Cl(9)   | 77.06(7)   | O(3)-Ba(2)-Cl(5)#6    | 72.26(13)  |
| O(3)-Ba(1)-Cl(9)#1  | 77.19(14)  | O(1)-Ba(2)-Cl(5)#6    | 93.92(13)  |
| Cl(6)-Ba(1)-Cl(9)#1 | 129.58(7)  | Cl(5)#5-Ba(2)-Cl(5)#6 | 94.50(5)   |



|                       |            |                       |            |
|-----------------------|------------|-----------------------|------------|
| Cl(8)-Ba(1)-Cl(9)#1   | 84.51(6)   | O(3)-Ba(2)-Cl(8)#1    | 121.13(13) |
| Cl(9)-Ba(1)-Cl(9)#1   | 73.59(7)   | O(1)-Ba(2)-Cl(8)#1    | 136.44(12) |
| O(3)-Ba(1)-Cl(4)#2    | 126.24(13) | Cl(5)#5-Ba(2)-Cl(8)#1 | 75.55(6)   |
| Cl(6)-Ba(1)-Cl(4)#2   | 75.64(7)   | Cl(5)#6-Ba(2)-Cl(8)#1 | 127.35(6)  |
| Cl(8)-Ba(1)-Cl(4)#2   | 80.85(6)   | O(3)-Ba(2)-Cl(2)#7    | 116.03(13) |
| Cl(9)-Ba(1)-Cl(4)#2   | 80.02(7)   | O(1)-Ba(2)-Cl(2)#7    | 158.96(13) |
| Cl(9)#1-Ba(1)-Cl(4)#2 | 152.09(7)  | Cl(5)#5-Ba(2)-Cl(2)#7 | 65.38(6)   |
| O(3)-Ba(1)-Cl(7)      | 63.00(14)  | Cl(5)#6-Ba(2)-Cl(2)#7 | 65.04(6)   |
| Cl(6)-Ba(1)-Cl(7)     | 100.18(7)  | Cl(8)#1-Ba(2)-Cl(2)#7 | 63.90(6)   |
| Cl(8)-Ba(1)-Cl(7)     | 150.21(7)  | O(3)-Ba(2)-Cl(3)#8    | 118.65(13) |
| Cl(9)-Ba(1)-Cl(7)     | 78.35(7)   | O(1)-Ba(2)-Cl(3)#8    | 73.41(13)  |
| Cl(9)#1-Ba(1)-Cl(7)   | 104.35(7)  | Cl(5)#5-Ba(2)-Cl(3)#8 | 66.52(6)   |
| Cl(4)#2-Ba(1)-Cl(7)   | 78.55(7)   | Cl(5)#6-Ba(2)-Cl(3)#8 | 145.55(6)  |
| O(3)-Ba(1)-Cl(1)#3    | 77.23(14)  | Cl(8)#1-Ba(2)-Cl(3)#8 | 77.43(6)   |
| Cl(6)-Ba(1)-Cl(1)#3   | 67.28(6)   | Cl(2)#7-Ba(2)-Cl(3)#8 | 123.75(6)  |
| Cl(8)-Ba(1)-Cl(1)#3   | 69.45(6)   | O(3)-Ba(2)-Cl(2)#8    | 100.45(13) |
| Cl(9)-Ba(1)-Cl(1)#3   | 128.64(6)  | O(1)-Ba(2)-Cl(2)#8    | 68.10(12)  |
| Cl(9)#1-Ba(1)-Cl(1)#3 | 65.63(7)   | Cl(5)#5-Ba(2)-Cl(2)#8 | 63.07(6)   |
| Cl(4)#2-Ba(1)-Cl(1)#3 | 129.02(7)  | Cl(5)#6-Ba(2)-Cl(2)#8 | 63.18(6)   |
| Cl(7)-Ba(1)-Cl(1)#3   | 140.21(6)  | Cl(8)#1-Ba(2)-Cl(2)#8 | 138.42(6)  |
| O(3)-B(1)-O(1)        | 120.3(10)  | Cl(2)#7-Ba(2)-Cl(2)#8 | 100.10(6)  |
| Cl(3)#8-Ba(2)-Cl(2)#8 | 82.41(5)   | Cl(8)#3-Ba(3)-Cl(2)   | 63.79(5)   |
| O(3)-Ba(2)-Cl(9)#1    | 69.23(12)  | O(1)-Ba(3)-Cl(1)#3    | 77.40(14)  |
| O(1)-Ba(2)-Cl(9)#1    | 69.94(12)  | Cl(7)#9-Ba(3)-Cl(1)#3 | 69.20(6)   |
| Cl(5)#5-Ba(2)-Cl(9)#1 | 125.05(6)  | Cl(9)#1-Ba(3)-Cl(1)#3 | 63.36(6)   |
| Cl(5)#6-Ba(2)-Cl(9)#1 | 140.40(6)  | Cl(3)#8-Ba(3)-Cl(1)#3 | 132.62(6)  |
| Cl(8)#1-Ba(2)-Cl(9)#1 | 68.87(6)   | Cl(1)-Ba(3)-Cl(1)#3   | 98.30(5)   |
| Cl(2)#7-Ba(2)-Cl(9)#1 | 126.15(6)  | Cl(8)#3-Ba(3)-Cl(1)#3 | 140.06(6)  |
| Cl(3)#8-Ba(2)-Cl(9)#1 | 65.85(5)   | Cl(2)-Ba(3)-Cl(1)#3   | 133.84(6)  |
| Cl(2)#8-Ba(2)-Cl(9)#1 | 132.91(5)  | O(1)-Ba(3)-Cl(9)#9    | 138.29(14) |
| O(1)-Ba(3)-Cl(7)#9    | 77.40(15)  | Cl(7)#9-Ba(3)-Cl(9)#9 | 73.44(6)   |
| O(1)-Ba(3)-Cl(9)#1    | 77.49(15)  | Cl(9)#1-Ba(3)-Cl(9)#9 | 99.22(6)   |
| Cl(7)#9-Ba(3)-Cl(9)#1 | 129.87(7)  | Cl(3)#8-Ba(3)-Cl(9)#9 | 140.38(6)  |
| O(1)-Ba(3)-Cl(3)#8    | 78.84(15)  | Cl(1)-Ba(3)-Cl(9)#9   | 61.95(6)   |
| Cl(7)#9-Ba(3)-Cl(3)#8 | 142.01(6)  | Cl(8)#3-Ba(3)-Cl(9)#9 | 75.97(6)   |
| Cl(9)#1-Ba(3)-Cl(3)#8 | 71.80(7)   | Cl(2)-Ba(3)-Cl(9)#9   | 122.83(6)  |
| O(1)-Ba(3)-Cl(1)      | 144.77(15) | Cl(1)#3-Ba(3)-Cl(9)#9 | 64.74(6)   |
| Cl(7)#9-Ba(3)-Cl(1)   | 134.35(6)  | O(2)-Ba(4)-Cl(2)      | 123.02(13) |

|                        |            |                        |            |
|------------------------|------------|------------------------|------------|
| Cl(9)#1-Ba(3)-Cl(1)    | 69.69(6)   | O(1)-Ba(4)-Cl(2)       | 75.16(13)  |
| Cl(3)#8-Ba(3)-Cl(1)    | 79.10(6)   | O(2)-Ba(4)-Cl(4)       | 77.30(15)  |
| O(1)-Ba(3)-Cl(8)#3     | 135.64(13) | O(1)-Ba(4)-Cl(4)       | 125.04(14) |
| Cl(7)#9-Ba(3)-Cl(8)#3  | 93.75(7)   | Cl(2)-Ba(4)-Cl(4)      | 127.82(7)  |
| Cl(9)#1-Ba(3)-Cl(8)#3  | 133.47(6)  | O(2)-Ba(4)-Cl(6)#6     | 72.68(12)  |
| Cl(3)#8-Ba(3)-Cl(8)#3  | 83.03(6)   | O(1)-Ba(4)-Cl(6)#6     | 105.53(13) |
| Cl(1)-Ba(3)-Cl(8)#3    | 67.48(6)   | Cl(2)-Ba(4)-Cl(6)#6    | 152.37(7)  |
| O(1)-Ba(3)-Cl(2)       | 72.37(14)  | Cl(4)-Ba(4)-Cl(6)#6    | 75.17(7)   |
| Cl(7)#9-Ba(3)-Cl(2)    | 70.72(6)   | O(2)-Ba(4)-Cl(2)#8     | 103.97(14) |
| Cl(9)#1-Ba(3)-Cl(2)    | 137.90(7)  | O(1)-Ba(4)-Cl(2)#8     | 73.17(14)  |
| Cl(3)#8-Ba(3)-Cl(2)    | 74.05(6)   | Cl(2)-Ba(4)-Cl(2)#8    | 77.67(7)   |
| Cl(1)-Ba(3)-Cl(2)      | 126.29(6)  | Cl(4)-Ba(4)-Cl(2)#8    | 149.53(6)  |
| O(2)-Ba(4)-Cl(3)       | 143.45(13) | Cl(7)#9-Ba(5)-Cl(8)#6  | 141.69(6)  |
| O(1)-Ba(4)-Cl(3)       | 148.93(14) | Cl(5)-Ba(5)-Cl(8)#6    | 77.39(6)   |
| Cl(2)-Ba(4)-Cl(3)      | 93.09(6)   | Cl(6)-Ba(5)-Cl(8)#6    | 69.37(6)   |
| Cl(4)-Ba(4)-Cl(3)      | 85.00(7)   | O(2)-Ba(5)-Cl(3)#11    | 134.54(14) |
| Cl(6)#6-Ba(4)-Cl(3)    | 71.97(6)   | Cl(7)#9-Ba(5)-Cl(3)#11 | 93.75(7)   |
| Cl(2)#8-Ba(4)-Cl(3)    | 76.27(7)   | Cl(5)-Ba(5)-Cl(3)#11   | 68.90(6)   |
| O(2)-Ba(4)-Cl(5)#10    | 129.44(14) | Cl(6)-Ba(5)-Cl(3)#11   | 132.80(6)  |
| O(1)-Ba(4)-Cl(5)#10    | 128.97(13) | Cl(8)#6-Ba(5)-Cl(3)#11 | 80.61(6)   |
| Cl(2)-Ba(4)-Cl(5)#10   | 66.15(6)   | O(2)-Ba(5)-Cl(1)#3     | 79.09(14)  |
| Cl(4)-Ba(4)-Cl(5)#10   | 65.29(6)   | Cl(7)#9-Ba(5)-Cl(1)#3  | 70.94(6)   |
| Cl(6)#6-Ba(4)-Cl(5)#10 | 124.24(6)  | Cl(5)-Ba(5)-Cl(1)#3    | 96.43(6)   |
| Cl(2)#8-Ba(4)-Cl(5)#10 | 125.63(6)  | Cl(6)-Ba(5)-Cl(1)#3    | 65.62(6)   |
| Cl(3)-Ba(4)-Cl(5)#10   | 67.08(6)   | Cl(8)#6-Ba(5)-Cl(1)#3  | 133.68(6)  |
| O(2)-Ba(4)-Cl(7)#9     | 71.66(12)  | Cl(3)#11-Ba(5)-Cl(1)#3 | 140.38(6)  |
| O(1)-Ba(4)-Cl(7)#9     | 71.63(13)  | O(2)-Ba(5)-Cl(4)       | 71.45(14)  |
| Cl(2)-Ba(4)-Cl(7)#9    | 71.38(6)   | Cl(7)#9-Ba(5)-Cl(4)    | 69.94(6)   |
| Cl(4)-Ba(4)-Cl(7)#9    | 72.16(7)   | Cl(5)-Ba(5)-Cl(4)      | 127.44(6)  |
| Cl(6)#6-Ba(4)-Cl(7)#9  | 135.75(6)  | Cl(6)-Ba(5)-Cl(4)      | 133.83(6)  |
| Cl(2)#8-Ba(4)-Cl(7)#9  | 137.75(6)  | Cl(8)#6-Ba(5)-Cl(4)    | 73.71(5)   |
| Cl(3)-Ba(4)-Cl(7)#9    | 132.37(6)  | Cl(3)#11-Ba(5)-Cl(4)   | 63.78(6)   |
| Cl(5)#10-Ba(4)-Cl(7)#9 | 65.45(6)   | Cl(1)#3-Ba(5)-Cl(4)    | 134.91(6)  |
| O(2)-Ba(5)-Cl(7)#9     | 77.62(14)  | O(2)-Ba(5)-Cl(4)#11    | 138.31(14) |
| O(2)-Ba(5)-Cl(5)       | 143.22(14) | Cl(7)#9-Ba(5)-Cl(4)#11 | 74.00(6)   |
| Cl(7)#9-Ba(5)-Cl(5)    | 135.81(6)  | Cl(5)-Ba(5)-Cl(4)#11   | 62.88(6)   |
| O(2)-Ba(5)-Cl(6)       | 75.56(14)  | Cl(6)-Ba(5)-Cl(4)#11   | 102.16(6)  |
| Cl(7)#9-Ba(5)-Cl(6)    | 132.19(7)  | Cl(8)#6-Ba(5)-Cl(4)#11 | 139.37(6)  |

|                        |            |                         |            |
|------------------------|------------|-------------------------|------------|
| Cl(5)-Ba(5)-Cl(6)      | 69.55(6)   | Cl(3)#11-Ba(5)-Cl(4)#11 | 77.66(6)   |
| O(2)-Ba(5)-Cl(8)#6     | 79.82(14)  | Cl(1)#3-Ba(5)-Cl(4)#11  | 63.15(6)   |
| Cl(4)-Ba(5)-Cl(4)#11   | 123.96(2)  | Cl(1)#13-Ba(6)-Cl(3)#2  | 76.81(6)   |
| O(3)-Ba(6)-O(2)        | 52.86(18)  | Cl(6)-Ba(6)-Cl(3)#2     | 68.45(5)   |
| O(3)-Ba(6)-Cl(5)#6     | 71.65(13)  | Cl(4)#7-Ba(6)-Cl(3)#2   | 64.98(6)   |
| O(2)-Ba(6)-Cl(5)#6     | 92.55(13)  | O(3)-Ba(6)-Cl(8)#6      | 118.33(14) |
| O(3)-Ba(6)-Cl(1)#13    | 160.77(12) | O(2)-Ba(6)-Cl(8)#6      | 73.20(14)  |
| O(2)-Ba(6)-Cl(1)#13    | 116.08(14) | Cl(5)#6-Ba(6)-Cl(8)#6   | 144.71(6)  |
| Cl(5)#6-Ba(6)-Cl(1)#13 | 95.02(6)   | Cl(1)#13-Ba(6)-Cl(8)#6  | 65.02(6)   |
| O(3)-Ba(6)-Cl(6)       | 70.96(13)  | Cl(6)-Ba(6)-Cl(8)#6     | 65.45(6)   |
| O(2)-Ba(6)-Cl(6)       | 72.13(12)  | Cl(4)#7-Ba(6)-Cl(8)#6   | 123.40(6)  |
| Cl(5)#6-Ba(6)-Cl(6)    | 141.42(6)  | Cl(3)#2-Ba(6)-Cl(8)#6   | 78.51(6)   |
| Cl(1)#13-Ba(6)-Cl(6)   | 123.56(6)  | O(3)-Ba(6)-Cl(6)#6      | 99.41(12)  |
| O(3)-Ba(6)-Cl(4)#7     | 117.54(14) | O(2)-Ba(6)-Cl(6)#6      | 65.56(12)  |
| O(2)-Ba(6)-Cl(4)#7     | 156.57(13) | Cl(5)#6-Ba(6)-Cl(6)#6   | 64.23(6)   |
| Cl(5)#6-Ba(6)-Cl(4)#7  | 64.30(6)   | Cl(1)#13-Ba(6)-Cl(6)#6  | 61.74(5)   |
| Cl(1)#13-Ba(6)-Cl(4)#7 | 65.52(6)   | Cl(6)-Ba(6)-Cl(6)#6     | 131.66(3)  |
| Cl(6)-Ba(6)-Cl(4)#7    | 128.11(6)  | Cl(4)#7-Ba(6)-Cl(6)#6   | 98.87(6)   |
| O(3)-Ba(6)-Cl(3)#2     | 122.21(12) | Cl(3)#2-Ba(6)-Cl(6)#6   | 138.35(6)  |
| O(2)-Ba(6)-Cl(3)#2     | 138.29(13) | Cl(8)#6-Ba(6)-Cl(6)#6   | 80.52(6)   |
| Cl(5)#6-Ba(6)-Cl(3)#2  | 127.16(6)  |                         |            |

Symmetry transformations used to generate equivalent atoms:

#1  $x-1,y,z$     #2  $-x+1,-y,-z+1$     #3  $-x,-y+1,-z+1$   
#4  $-x,-y,-z+1$     #5  $-x+1/2,y+1/2,-z+1/2$     #6  $-x-1/2,y-1/2,-z+1/2$   
#7  $-x+1/2,y-1/2,-z+1/2$     #8  $x+1/2,-y+1/2,z+1/2$   
#9  $x+1,y,z$     #10  $x+1/2,-y+1/2,z-1/2$     #11  $-x-1/2,y+1/2,-z+1/2$   
#12  $x-1/2,-y+1/2,z+1/2$     #13  $x-1/2,-y+1/2,z-1/2$

**Table S5.** Selected bond distances (Å) and angles (deg) for Pb<sub>6</sub>BO<sub>4</sub>Cl<sub>7</sub>.

|                     |            |                     |            |
|---------------------|------------|---------------------|------------|
| Pb(1)-O(4)          | 2.360(12)  | O(4)-Pb(2)-Cl(5)    | 75.4(3)    |
| Pb(1)-O(1)          | 2.402(11)  | O(2)-Pb(2)-Cl(4)    | 78.1(3)    |
| Pb(1)-Cl(1)         | 2.955(5)   | O(4)-Pb(2)-Cl(4)    | 132.2(3)   |
| Pb(1)-Cl(2)#1       | 3.036(5)   | Cl(5)-Pb(2)-Cl(4)   | 74.64(14)  |
| Pb(1)-Cl(3)#2       | 3.074(6)   | O(2)-Pb(2)-Cl(4)#3  | 74.5(3)    |
| Pb(2)-O(2)          | 2.335(12)  | O(4)-Pb(2)-Cl(4)#3  | 109.7(3)   |
| Pb(2)-O(4)          | 2.506(12)  | Cl(5)-Pb(2)-Cl(4)#3 | 144.19(13) |
| Pb(2)-Cl(5)         | 2.886(5)   | Cl(4)-Pb(2)-Cl(4)#3 | 77.00(14)  |
| Pb(2)-Cl(4)         | 2.954(5)   | O(4)-Pb(3)-O(3)     | 59.7(4)    |
| Pb(2)-Cl(4)#3       | 3.031(5)   | O(4)-Pb(3)-Cl(5)    | 78.3(3)    |
| Pb(3)-O(4)          | 2.303(12)  | O(3)-Pb(3)-Cl(5)    | 75.5(3)    |
| Pb(3)-O(3)          | 2.538(12)  | O(4)-Pb(3)-Cl(2)    | 76.4(3)    |
| Pb(3)-Cl(5)         | 2.889(5)   | O(3)-Pb(3)-Cl(2)    | 130.6(3)   |
| Pb(3)-Cl(2)         | 2.982(5)   | Cl(5)-Pb(3)-Cl(2)   | 74.30(14)  |
| Pb(4)-O(3)          | 2.298(12)  | O(3)-Pb(4)-O(2)     | 60.2(4)    |
| Pb(4)-O(2)          | 2.540(11)  | O(3)-Pb(4)-Cl(5)    | 80.3(3)    |
| Pb(4)-Cl(5)         | 2.836(5)   | O(2)-Pb(4)-Cl(5)    | 76.5(3)    |
| Pb(4)-Cl(3)         | 2.908(5)   | O(3)-Pb(4)-Cl(3)    | 77.5(3)    |
| Pb(5)-O(2)          | 2.319(11)  | O(2)-Pb(4)-Cl(3)    | 131.5(3)   |
| Pb(5)-O(1)          | 2.367(14)  | Cl(5)-Pb(4)-Cl(3)   | 73.83(15)  |
| Pb(5)-Cl(6)         | 2.898(5)   | O(2)-Pb(5)-O(1)     | 61.3(4)    |
| Pb(5)-Cl(4)#3       | 3.080(5)   | O(2)-Pb(5)-Cl(6)    | 99.7(3)    |
| Pb(6)-O(1)          | 2.361(13)  | O(1)-Pb(5)-Cl(6)    | 79.5(3)    |
| Pb(6)-O(3)          | 2.373(13)  | O(2)-Pb(5)-Cl(4)#3  | 73.7(3)    |
| Pb(6)-Cl(7)         | 2.852(5)   | O(1)-Pb(5)-Cl(4)#3  | 111.9(3)   |
| Pb(6)-Cl(6)         | 3.078(5)   | Cl(6)-Pb(5)-Cl(4)#3 | 160.09(15) |
| B(1)-O(1)           | 1.471(2)   | O(1)-Pb(6)-O(3)     | 61.3(4)    |
| B(1)-O(3)           | 1.476(3)   | O(1)-Pb(6)-Cl(7)    | 80.0(3)    |
| B(1)-O(4)           | 1.481(6)   | O(3)-Pb(6)-Cl(7)    | 101.4(3)   |
| B(1)-O(2)           | 1.490(2)   | O(1)-Pb(6)-Cl(6)    | 75.8(3)    |
| O(4)-Pb(1)-O(1)     | 60.8(4)    | O(3)-Pb(6)-Cl(6)    | 97.3(3)    |
| O(4)-Pb(1)-Cl(1)    | 106.6(3)   | Cl(7)-Pb(6)-Cl(6)   | 137.21(17) |
| O(1)-Pb(1)-Cl(1)    | 79.3(3)    | O(1)-B(1)-O(3)      | 110.4(15)  |
| O(4)-Pb(1)-Cl(2)#1  | 74.1(3)    | O(1)-B(1)-O(4)      | 109.5(14)  |
| O(1)-Pb(1)-Cl(2)#1  | 114.3(3)   | O(3)-B(1)-O(4)      | 109.6(14)  |
| Cl(1)-Pb(1)-Cl(2)#1 | 163.06(14) | O(1)-B(1)-O(2)      | 107.8(14)  |
| O(4)-Pb(1)-Cl(3)#2  | 70.4(3)    | O(3)-B(1)-O(2)      | 110.5(14)  |

---

|                       |           |                |           |
|-----------------------|-----------|----------------|-----------|
| O(1)-Pb(1)-Cl(3)#2    | 114.3(3)  | O(4)-B(1)-O(2) | 109.1(15) |
| Cl(1)-Pb(1)-Cl(3)#2   | 75.34(14) |                |           |
| Cl(2)#1-Pb(1)-Cl(3)#2 | 89.37(14) |                |           |
| O(2)-Pb(2)-O(4)       | 60.0(4)   |                |           |
| O(2)-Pb(2)-Cl(5)      | 78.6(3)   |                |           |

---

Symmetry transformations used to generate equivalent atoms:

#1  $-x+1, -y, -z+2$     #2  $x, y-1, z$     #3  $-x+1, -y, -z+1$

#4  $x, y+1, z$

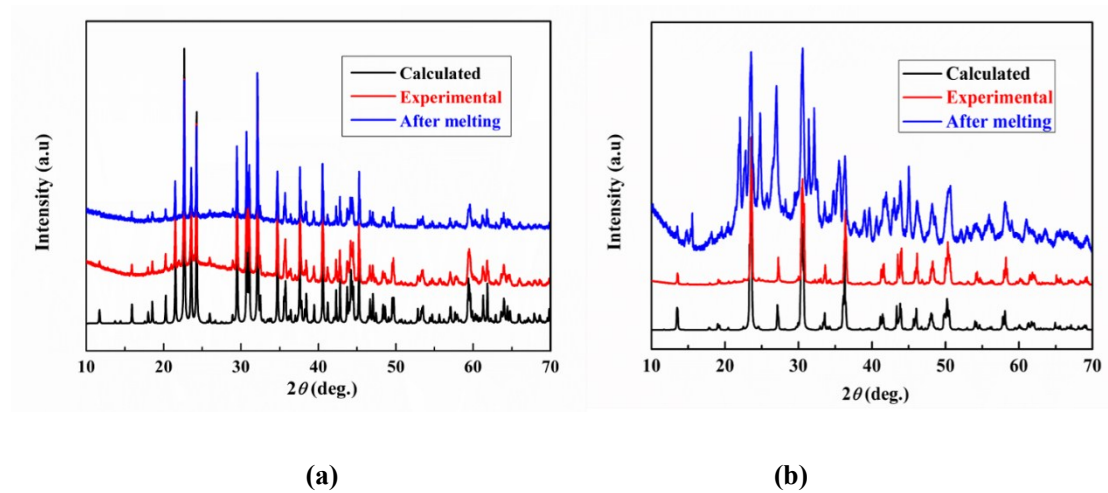

**Fig. S1** X-ray powder diffraction patterns of  $\text{Ba}_6\text{BO}_3\text{Cl}_9$  (a) and  $\text{Pb}_6\text{BO}_4\text{Cl}_7$  (b).

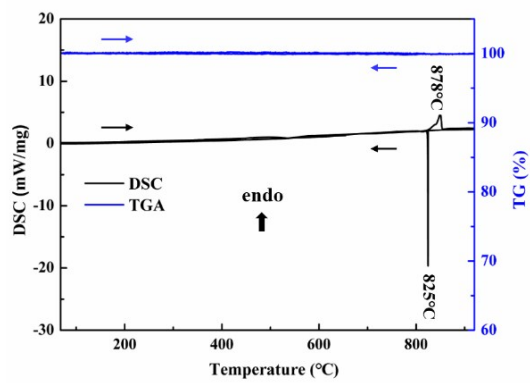

(a)

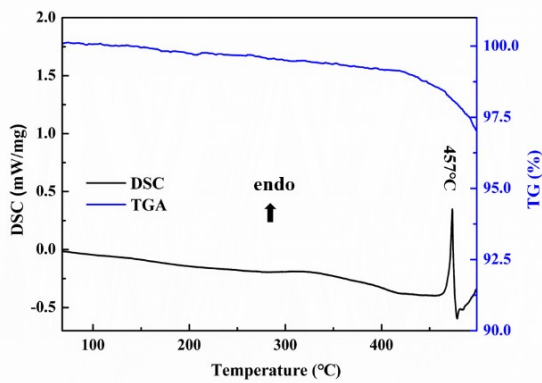

(b)

**Fig. S2** DSC-TG curves of Ba<sub>6</sub>BO<sub>3</sub>Cl<sub>9</sub> (a) and Pb<sub>6</sub>BO<sub>4</sub>Cl<sub>7</sub> (b).

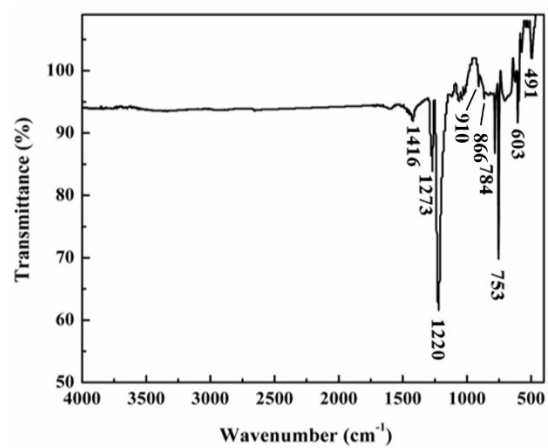

(a)

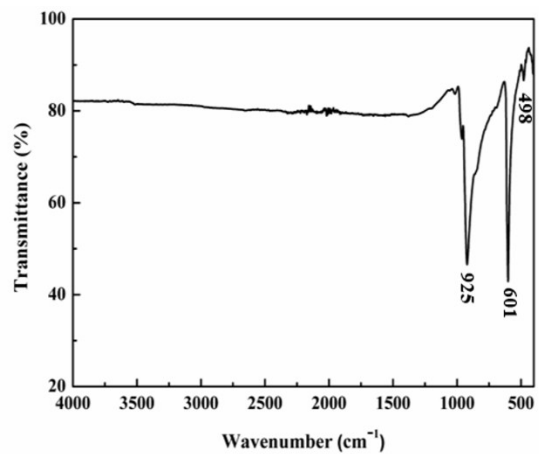

(b)

Fig. S3 IR spectra of Ba<sub>6</sub>BO<sub>3</sub>Cl<sub>9</sub> (a) and Pb<sub>6</sub>BO<sub>4</sub>Cl<sub>7</sub> (b).



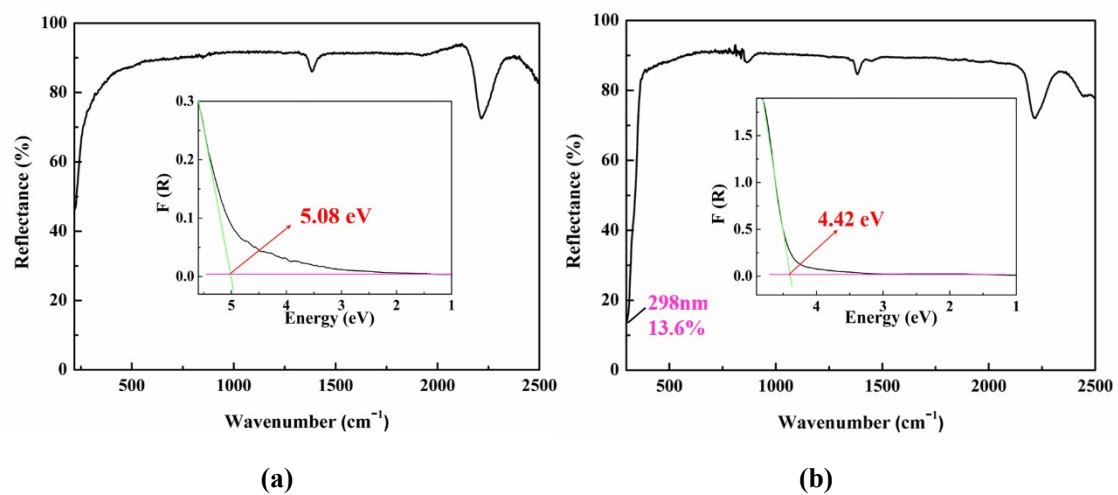

**Fig. S4** UV-vis-NIR spectra of  $\text{Ba}_6\text{BO}_3\text{Cl}_9$  (a) and  $\text{Pb}_6\text{BO}_4\text{Cl}_7$  (b).

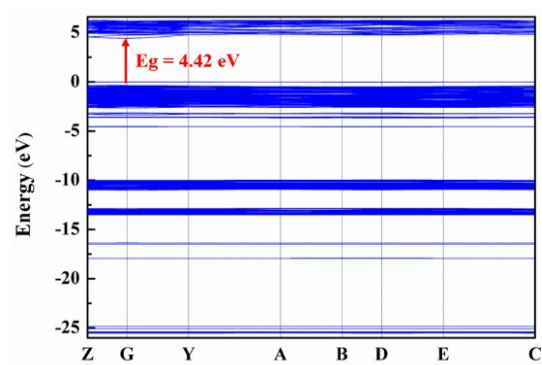

(a)

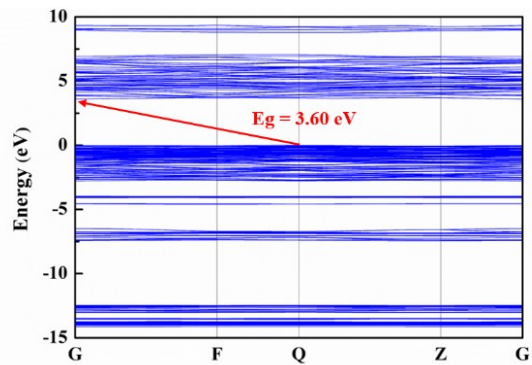

(b)

Fig. S5 The calculated band gaps of  $\text{Ba}_6\text{BO}_3\text{Cl}_9$  (a) and  $\text{Pb}_6\text{BO}_4\text{Cl}_7$  (b).

## References

- 1 G. M. Sheldrick, *Acta Crystallogr. Sect. A: Found. Adv.*, 2015, **71**, 3.
- 2 G. M. Sheldrick, *Acta Crystallogr. Sect. A.*, 2008, **64**, 112.
- 3 A. L. Spek, *J. Appl. Crystallogr.*, 2003, **36**, 7.
- 4 P. Kubelka, F. Z. Munk, *Tech. Phys.*, 1931, **12**, 593.
- 5 J. Tauc, *Mater. Res. Bull.*, 1970, **5**, 721.
